# Supplementary material for: A simple model to predict risk of gestational diabetes mellitus from 8 to 20 weeks of gestation in Chinese women
Source: Springer Nature journal article supplement (doi:10.1186/s12884-019-2374-8), 2019-07-19

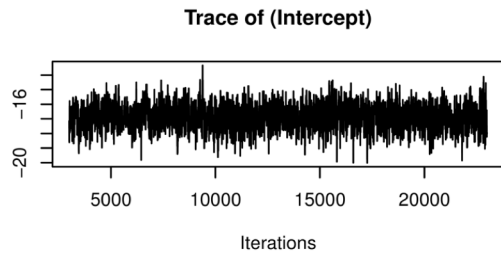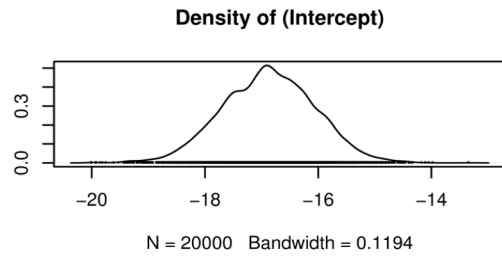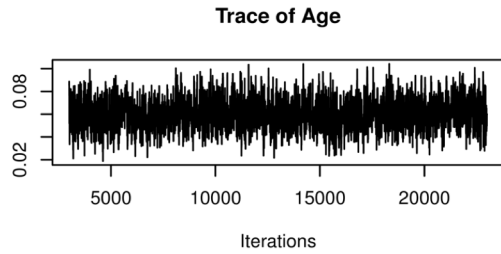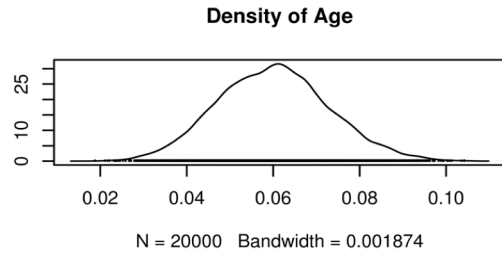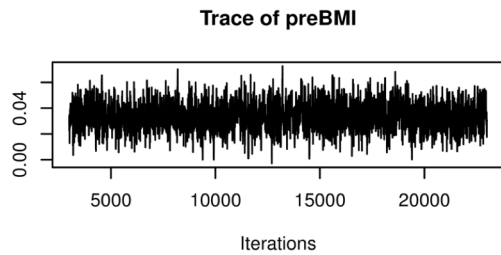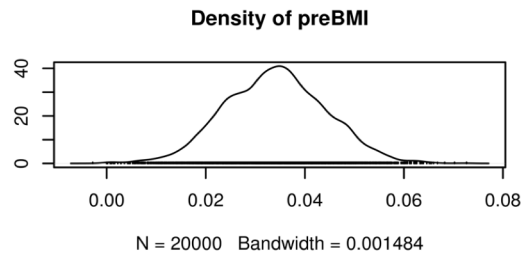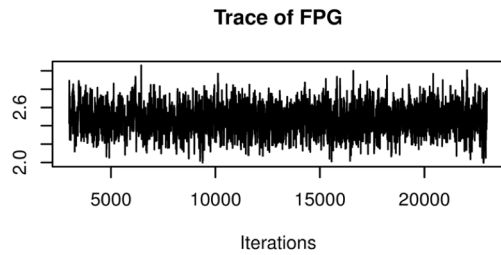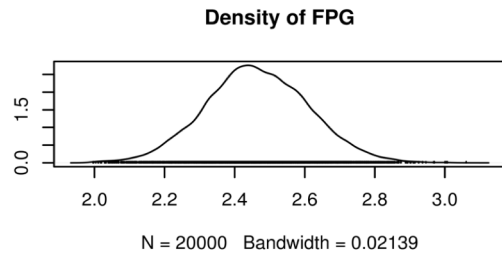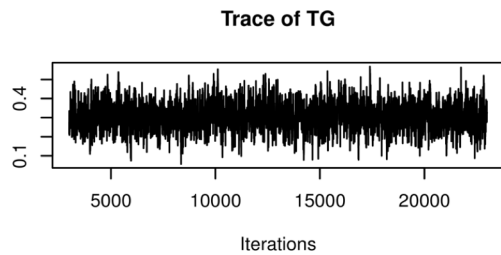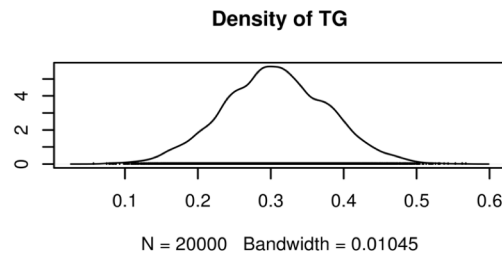

Supplement: MOESM1 [file 16965464]
