# Supplementary material for: A simple model to predict risk of gestational diabetes mellitus from 8 to 20 weeks of gestation in Chinese women
Source: Springer Nature journal article supplement (doi:10.1186/s12884-019-2374-8), 2019-07-19
Supplement: MOESM2 [file 16965464]

| Cut-off Probability | Specificity (low) | Specificity (median) | Specificity (high) | Sensitivity (low) | Sensitivity (median) | Sensitivity (high) |
|---------------------|-------------------|----------------------|--------------------|-------------------|----------------------|--------------------|
| 0.0379              | 0.1603            | 0.1734               | 0.1857             | 0.9309            | 0.9501               | 0.9674             |
| 0.0552              | 0.2969            | 0.3115               | 0.3273             | 0.8752            | 0.9002               | 0.9251             |
| 0.0747              | 0.4292            | 0.4455               | 0.4613             | 0.8196            | 0.8503               | 0.8810             |
| 0.0823              | 0.4876            | 0.5048               | 0.5203             | 0.7965            | 0.8292               | 0.8618             |
| 0.0893              | 0.5328            | 0.5504               | 0.5664             | 0.7658            | 0.8004               | 0.8349             |
| 0.1004              | 0.5927            | 0.6093               | 0.6260             | 0.7121            | 0.7505               | 0.7889             |
| 0.1105              | 0.6339            | 0.6499               | 0.6663             | 0.6910            | 0.7294               | 0.7678             |
| 0.1224              | 0.6794            | 0.6955               | 0.7107             | 0.6621            | 0.7006               | 0.7409             |
| 0.1397              | 0.7358            | 0.7512               | 0.7655             | 0.6257            | 0.6641               | 0.7044             |
| 0.1438              | 0.7472            | 0.7618               | 0.7758             | 0.6104            | 0.6507               | 0.6929             |
| 0.1597              | 0.7883            | 0.8018               | 0.8146             | 0.5739            | 0.6161               | 0.6564             |
| 0.1674              | 0.8029            | 0.8158               | 0.8286             | 0.5566            | 0.6008               | 0.6411             |
| 0.1827              | 0.8394            | 0.8511               | 0.8631             | 0.5355            | 0.5758               | 0.6161             |
| 0.1937              | 0.8569            | 0.8683               | 0.8794             | 0.5086            | 0.5509               | 0.5912             |
| 0.2167              | 0.8876            | 0.8972               | 0.9074             | 0.4587            | 0.5010               | 0.5432             |
| 0.2422              | 0.9139            | 0.9226               | 0.9314             | 0.4107            | 0.4530               | 0.4952             |
| 0.2690              | 0.9299            | 0.9381               | 0.9460             | 0.3570            | 0.4012               | 0.4415             |
| 0.2868              | 0.9428            | 0.9501               | 0.9574             | 0.3301            | 0.3724               | 0.4127             |

Note: not for clinical diagnosis, only for research.

Probability of GDM=1/(1+1/exp(Age\*0.0601+BMI\*0.03405+FPG\*2.46427+TG\*0.30648-16.87528)).
