# Supplementary material for: A simple model to predict risk of gestational diabetes mellitus from 8 to 20 weeks of gestation in Chinese women
Source: Springer Nature journal article supplement (doi:10.1186/s12884-019-2374-8), 2019-07-19
Supplement: MOESM3 [file 16965464]

|                                     | <u>Frequentist</u> |                | Bayesian           |
|-------------------------------------|--------------------|----------------|--------------------|
|                                     | OR (95% CI)        | <i>p</i> value | OR (94% HDI)       |
| Age                                 | 1.06(1.03,1.09)    | 2.219e-6       | 1.06(1.04,1.09)    |
| Pre-gravid BMI                      | 1.03(1.01, 1.05)   | 7.454e-4       | 1.03(1.01,1.05)    |
| FPG                                 | 11.74(8.79,15.68)  | 1.759e-62      | 11.75(8.85,15.74)  |
| TG                                  | 1.36(1.18, 1.56)   | 1.190e-5       | 1.36(1.18,1.56)    |
| Cutoff probability at maximal AUROC | 0.178              | NA             | 0.178              |
| AUROC                               | 0.766 (0.73, 0.80) | NA             | 0.766 (0.73, 0.80) |
| Sensitivity                         | 0.587              | NA             | 0.589              |
| Specificity                         | 0.842              | NA             | 0.843              |

**Note:** FPG, fasting plasma glucose; TG, triglyceride; cutoff prob., cutoff probability using the model formula and original dataset; AUROC, area under the receiver operating curve.
